# Supplementary material for: Mitochondrial Genome Evolution and a Novel RNA Editing System in Deep-Branching Heteroloboseids
Source: PubMed Central journal article supplement — Genome Biol Evol. 2017 May 1;9(5):1161–74. doi: 10.1093/gbe/evx086 (PMC5421314; doi:10.1093/gbe/evx086), 2017-05-01
Supplement: evx086_Supp.pdf [file evx086_Supp.pdf]

## Supplementary Material

Table S1. Primers used to link genomic contigs.

| <b>Name</b> | <b>Primer sequence (5' – 3')</b> |
|-------------|----------------------------------|
| B1          | GAGGTGCCCTCTTCCTTTCT             |
| B2          | TGGTAACTTCCAATCACCTCT            |
| B3          | TTTACGTTTGTTAGAGCGAAGTC          |
| B4          | GGGACTTGAACCGCAACTTC             |
| B5          | CGTTCATGCAATGAAAACAGAAGC         |
| B6          | CGGCTGATTACACCTCCGTG             |
| P1          | AGTCTCTCTAGCCGGTATTAGT           |
| P2          | TGCCAAGACGAATACCTGACT            |
| P3          | GTGACGTACGAAGTATGTTCCCT          |
| P4          | GTA CTCCAGTGGCTCCTACG            |
| P5          | GGACATCATAGAAACATAATCTAACCTATC   |
| P6          | CATCAAATCTAAATCACTATACTCATATG    |

Table S2. GenBank accession numbers of protein sequences used to build hidden Markov models

| <b>Species</b>                       | <b>ccmC</b>                                                         | <b>ccmF</b>                                                         | <b>TatC</b>                                                                     | <b>Rpl10</b>                                                        | <b>Rps4</b>                                                                     |
|--------------------------------------|---------------------------------------------------------------------|---------------------------------------------------------------------|---------------------------------------------------------------------------------|---------------------------------------------------------------------|---------------------------------------------------------------------------------|
| <i>Andalucia godoyi</i>              | YP_007890513.1                                                      | YP_007890514.1<br>AGH24008.1                                        | YP_007890501.1                                                                  | YP_007890474.1                                                      | YP_007890498.1                                                                  |
| <i>Histiona aroides</i>              | YP_007890585.1<br>AGH24079.1                                        | YP_007890584.1<br>AGH24078.1                                        | YP_007890573.1                                                                  | YP_007890543.1                                                      | YP_007890570.1                                                                  |
| ' <i>Jakoba bahamiensis</i> '        | YP_007890628.1                                                      | YP_007890629.1<br>AGH24123.1                                        | YP_007890642.1                                                                  | YP_007890649.1                                                      | YP_007890639.1<br>YP_007890639.1                                                |
| <i>Jakoba libera</i>                 | YP_007890700.1                                                      | YP_007890699.1<br>AGH24193.1                                        | YP_007890756.1                                                                  | YP_007890732.1                                                      | YP_007890684.1                                                                  |
| <i>Naegleria fowleri</i>             | AOS85673.1<br>AOS85627.1<br>YP_007890053.1<br>AFP72326.1            | AOS85658.1<br>AOS85612.1<br>YP_007890060.1<br>AFP72333.1            | N/A                                                                             | N/A                                                                 | AOS85659.1<br>AOS85613.1<br>YP_007890062.1<br>AFP72335.1                        |
| <i>Naegleria gruberi</i>             | AAG17810.1<br>NP_066532.1                                           | AAG17817.1<br>NP_066539.1                                           | AAG17818.1                                                                      | N/A                                                                 | AAG17819.1                                                                      |
| <i>Reclinomonas americana</i>        | NP_044790.1<br>AAD11905.1<br>AGH24367.1<br>AGH24434.1<br>AGH24300.1 | NP_044789.1<br>AAD11904.1<br>AGH24366.1<br>AGH24433.1<br>AGH24299.1 | AAD11893.1<br>NP_044778.1<br>AGH24355.1<br>AGH24422.1<br>AGH24288.1<br>O21266.1 | NP_044748.1<br>AAD11863.1<br>AGH24325.1<br>AGH24392.1<br>AGH24258.1 | NP_044775.1<br>AAD11890.1<br>O21263.1<br>AGH24352.1<br>AGH24419.1<br>AGH24285.1 |
| ' <i>Seculamonas ecuadoriensis</i> ' | YP_007890768.1                                                      | YP_007890781.1<br>AGH24476.1                                        | YP_007890761.1<br>AGH24456.1                                                    | YP_007890790.1                                                      | YP_007890767.1                                                                  |
| <i>Tsukubamonas globosa</i>          | N/A                                                                 | N/A                                                                 | N/A                                                                             | N/A                                                                 | YP_009004138.1                                                                  |

Table S3. Primers used to confirm RNA editing sites in amoeba BB2

| <b>Name</b> | <b>Forward primer sequence (5'-3')</b> | <b>Reverse primer sequence (5'-3')</b> | <b>Position on mtDNA</b> |
|-------------|----------------------------------------|----------------------------------------|--------------------------|
| B1          | GCCAGGAAGTGGTGGTATTCT                  | CCGCTATTCGACGCAAAAACA                  | 30511-31294              |
| Br5         | AGTGCGACTAGTGCTGAACC                   | GATGCGATTGTTGAAGGCC                    | 33489-34977              |
| Br7         | CGGCTACCGTCTAAACGAGG                   | GCAACTTCTTTGCAGTTTCCTG                 | 35051-35692              |
| Br9         | GTTCTCAAGCGTTGGACCGT                   | AAGTGAAAATGCAAAATCGAAGTCA              | 36580-37216              |
| Br13        | TCTTTATGTTTCATTGCGCTATTTGT             | ACGTTTTCCGTTCTTAAAAGTCCA               | 38703-40109              |
| Br15        | TGGACTIONTTAAGAACGGAAAACG              | TCAAACATTCATTACACACAGCTT               | 40086-41253              |
| Br21        | AGGTTTGCCAAAGACGGTGA                   | TTCCACATACGTGGGTTCCGG                  | 55272-55645              |
| Br23        | GTCCATGTAGGTACGCCGAA                   | AACGCCCTTCGCTATAAGCA                   | 61595-62301              |

Table S4. Number of editing sites for each gene by nucleotide type.

| <b>Gene</b>  | <b>Length (bp)</b> | <b>A</b> | <b>U</b> | <b>G</b> | <b>C</b> | <b>Total</b> |
|--------------|--------------------|----------|----------|----------|----------|--------------|
| <i>atp1</i>  | 2442               | 5        | 0        | 13       | 1        | 19           |
| <i>atp3</i>  | 861                | 4        | 0        | 6        | 1        | 11           |
| <i>atp6</i>  | 756                | 1        | 0        | 4        | 1        | 6            |
| <i>atp8</i>  | 381                | 0        | 0        | 1        | 0        | 1            |
| <i>atp9</i>  | 231                | 0        | 0        | 2        | 0        | 2            |
| <i>cob</i>   | 1203               | 0        | 1        | 9        | 0        | 10           |
| <i>cox1</i>  | 2016               | 1        | 1        | 23       | 2        | 27           |
| <i>cox11</i> | 411                | 0        | 0        | 1        | 0        | 1            |
| <i>cox2</i>  | 744                | 0        | 0        | 7        | 1        | 8            |
| <i>cox3</i>  | 1455               | 0        | 0        | 11       | 0        | 11           |
| <i>nad1</i>  | 1281               | 0        | 0        | 11       | 1        | 12           |
| <i>nad11</i> | 2112               | 0        | 0        | 14       | 3        | 17           |
| <i>nad2</i>  | 1533               | 0        | 3        | 8        | 0        | 11           |
| <i>nad3</i>  | 465                | 0        | 0        | 3        | 0        | 3            |
| <i>nad4</i>  | 1407               | 0        | 0        | 12       | 0        | 12           |
| <i>nad4L</i> | 345                | 0        | 0        | 3        | 0        | 3            |
| <i>nad5</i>  | 1986               | 1        | 0        | 16       | 1        | 18           |
| <i>nad6</i>  | 642                | 0        | 0        | 6        | 1        | 7            |
| <i>nad7</i>  | 1203               | 0        | 0        | 12       | 2        | 14           |
| <i>nad8</i>  | 483                | 1        | 0        | 4        | 1        | 6            |
| <i>nad9</i>  | 669                | 2        | 0        | 2        | 0        | 4            |
| <i>rpl10</i> | 582                | 0        | 1        | 4        | 0        | 5            |
| <i>rpl11</i> | 516                | 1        | 0        | 2        | 0        | 3            |
| <i>rpl14</i> | 369                | 1        | 0        | 4        | 0        | 5            |
| <i>rpl16</i> | 396                | 0        | 0        | 3        | 0        | 3            |
| <i>rpl2</i>  | 807                | 0        | 0        | 11       | 0        | 11           |
| <i>rpl32</i> | 177                | 0        | 0        | 0        | 0        | 0            |
| <i>rpl5</i>  | 525                | 0        | 0        | 5        | 0        | 5            |
| <i>rpl6</i>  | 687                | 0        | 0        | 7        | 0        | 7            |
| <i>rps10</i> | 648                | 0        | 0        | 2        | 0        | 2            |
| <i>rps11</i> | 2139               | 0        | 0        | 14       | 0        | 14           |
| <i>rps12</i> | 363                | 1        | 0        | 3        | 0        | 4            |
| <i>rps13</i> | 444                | 0        | 0        | 3        | 0        | 3            |
| <i>rps14</i> | 306                | 1        | 0        | 3        | 0        | 4            |
| <i>rps19</i> | 282                | 0        | 0        | 3        | 0        | 3            |
| <i>rps2</i>  | 993                | 0        | 0        | 5        | 0        | 5            |
| <i>rps3</i>  | 3030               | 1        | 0        | 13       | 1        | 15           |
| <i>rps7</i>  | 930                | 0        | 0        | 7        | 0        | 7            |
| <i>rps8</i>  | 396                | 0        | 1        | 2        | 0        | 3            |
| <i>sdh2</i>  | 768                | 0        | 0        | 6        | 1        | 7            |

| <b>Gene</b>        | <b>Length (bp)</b> | <b>A</b>  | <b>U</b>  | <b>G</b>   | <b>C</b>  | <b>Total</b> |
|--------------------|--------------------|-----------|-----------|------------|-----------|--------------|
| <i>orf164</i>      | 495                | 0         | 0         | 4          | 0         | 4            |
| <i>orf242</i>      | 729                | 1         | 1         | 3          | 1         | 6            |
| <i>orf3630</i>     | 10893              | 9         | 5         | 71         | 3         | 88           |
| <i>orf925</i>      | 2778               | 2         | 1         | 12         | 0         | 15           |
| <i>rnl</i>         | 2840               | 0         | 0         | 20         | 2         | 22           |
| <i>rns</i>         | 1654               | 0         | 1         | 15         | 2         | 18           |
| <i>trnA(ugc)</i>   | 73                 | 0         | 0         | 0          | 0         | 0            |
| <i>trnC(gca)</i>   | 71                 | 0         | 0         | 1          | 0         | 1            |
| <i>trnD(guc)</i>   | 74                 | 0         | 0         | 1          | 0         | 1            |
| <i>trnE(uuc)</i>   | 73                 | 0         | 0         | 0          | 0         | 0            |
| <i>trnF(gaa)_1</i> | 72                 | 0         | 0         | 1          | 0         | 1            |
| <i>trnF(gaa)_2</i> | 75                 | 0         | 0         | 0          | 0         | 0            |
| <i>trnG(ucc)</i>   | 71                 | 0         | 0         | 1          | 0         | 1            |
| <i>trnH(gug)</i>   | 74                 | 0         | 0         | 0          | 0         | 0            |
| <i>trnI(gau)</i>   | 73                 | 0         | 0         | 1          | 0         | 1            |
| <i>trnK(uuu)</i>   | 72                 | 0         | 0         | 1          | 0         | 1            |
| <i>trnL(caa)</i>   | 82                 | 0         | 0         | 0          | 0         | 0            |
| <i>trnL(gag)</i>   | 74                 | 0         | 0         | 0          | 0         | 0            |
| <i>trnL(uaa)</i>   | 84                 | 0         | 0         | 1          | 0         | 1            |
| <i>trnL(uag)</i>   | 74                 | 0         | 0         | 0          | 0         | 0            |
| <i>trnM(cau)_1</i> | 72                 | 0         | 1         | 0          | 0         | 1            |
| <i>trnM(cau)_2</i> | 73                 | 0         | 0         | 0          | 0         | 0            |
| <i>trnN(guu)</i>   | 73                 | 0         | 0         | 0          | 0         | 0            |
| <i>trnP(ugg)</i>   | 74                 | 0         | 0         | 1          | 0         | 1            |
| <i>trnQ(uug)</i>   | 72                 | 0         | 0         | 0          | 0         | 0            |
| <i>trnR(ucu)</i>   | 74                 | 0         | 0         | 1          | 0         | 1            |
| <i>trnS(gcu)</i>   | 85                 | 1         | 0         | 0          | 0         | 1            |
| <i>trnS(gga)</i>   | 85                 | 0         | 0         | 0          | 0         | 0            |
| <i>trnS(uga)</i>   | 82                 | 0         | 0         | 0          | 0         | 0            |
| <i>trnW(cca)</i>   | 74                 | 0         | 0         | 0          | 0         | 0            |
| <i>trnY(gua)</i>   | 83                 | 0         | 0         | 1          | 0         | 1            |
| intergenic region  | 83                 | 1         | 0         | 0          | 0         | 1            |
| <b>Total</b>       |                    | <b>34</b> | <b>16</b> | <b>400</b> | <b>25</b> | <b>475</b>   |

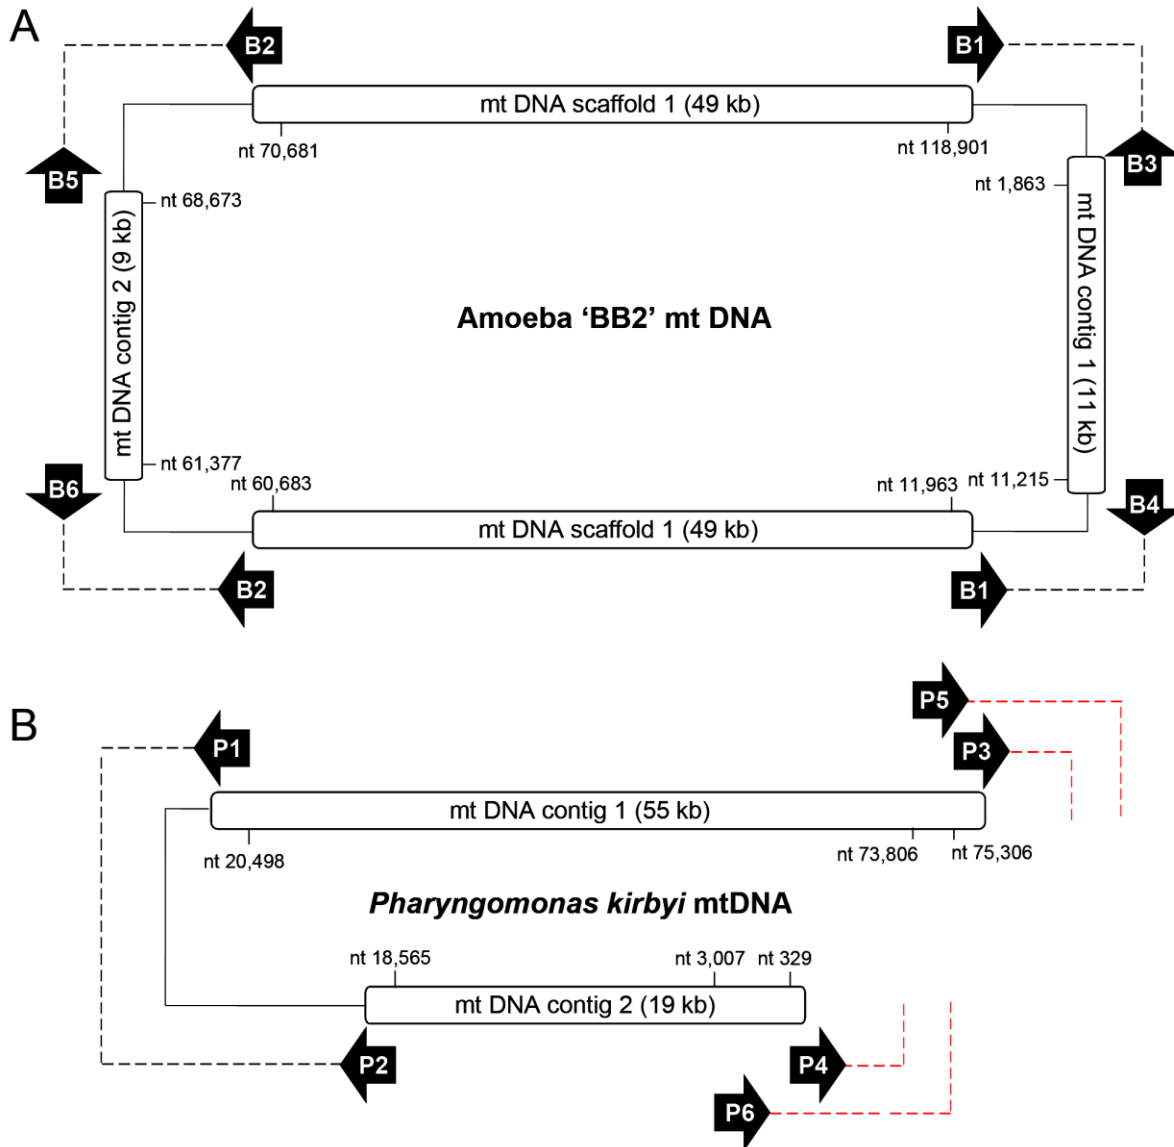

Figure S1. Schematic maps demonstrating how gaps in (A) amoeba 'BB2' and (B) *P. kirbyi* mitochondrial genomes were closed after sequencing of long-range PCR amplicons amplified with primers (black arrows, nucleotide numbers indicate the positions of binding sites) listed in Table S1. The set of PCR reactions that did not yield products is highlighted in red dashed lines.

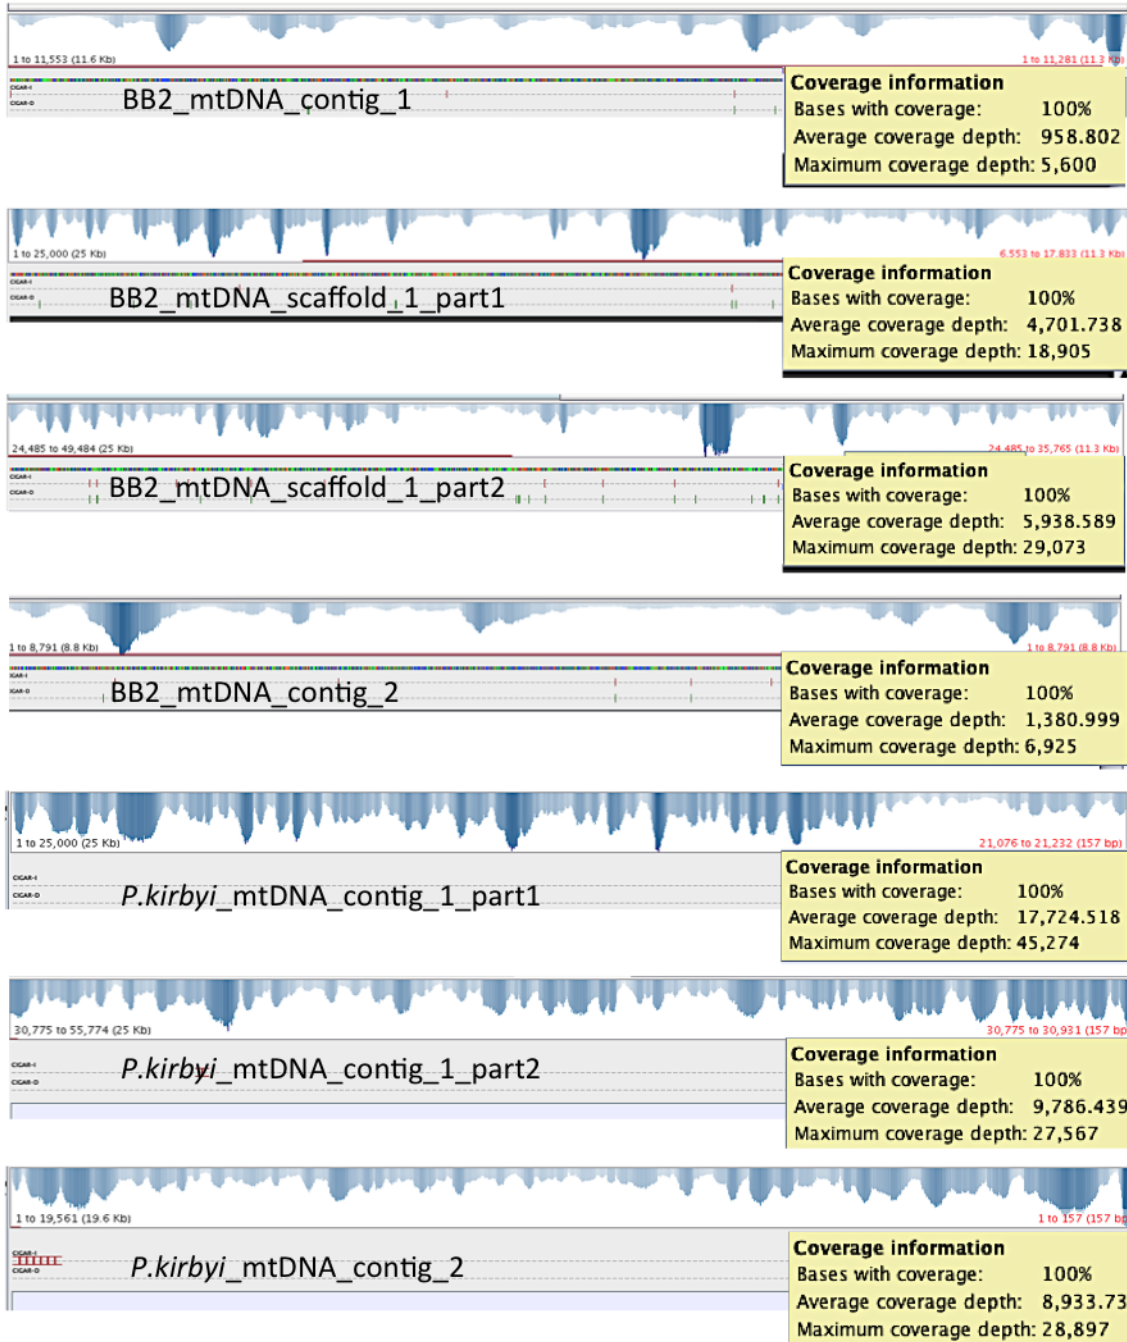

Figure S2. Assembly coverage plots for the mitochondrial genome of BB2 and *P. kirbyi* by contigs (shown in Figure S1).

|                      | S10          |              |             |             |              |             |              |              |               |             |              |              |              | Spc          |
|----------------------|--------------|--------------|-------------|-------------|--------------|-------------|--------------|--------------|---------------|-------------|--------------|--------------|--------------|--------------|
| <i>Rickettsia</i>    | <i>rps10</i> | ---          | <i>rpl3</i> | <i>rpl4</i> | <i>rpl23</i> | <i>rpl2</i> | <i>rps19</i> | <i>rpl22</i> | ---           | <i>rps3</i> | <i>rpl16</i> | <i>rpl29</i> | <i>rps17</i> | <i>rpl14</i> |
| <i>Andalucia</i>     | <i>rps10</i> | ---          | ---         | ---         | ---          | <i>rpl2</i> | <i>rps19</i> | ---          | ---           | <i>rps3</i> | <i>rpl16</i> | ---          | ---          | <i>rpl14</i> |
| <i>Tsukubamonas</i>  | ---          | ---          | ---         | ---         | ---          | <i>rpl2</i> | <i>rps19</i> | ---          | ---           | <i>rps3</i> | <i>rpl16</i> | ---          | ---          | <i>rpl14</i> |
| <i>Amoeba</i> BB2    | <i>rps10</i> | ---          | ---         | ---         | ---          | <i>rpl2</i> | <i>rps19</i> | ---          | <i>urf219</i> | <i>rps3</i> | <i>rpl16</i> | ---          | ---          | <i>rpl14</i> |
| <i>Pharyngomonas</i> | <i>rps10</i> | ---          | ---         | ---         | ---          | <i>rpl2</i> | <i>rps19</i> | ---          | ---           | <i>rps3</i> | <i>rpl16</i> | ---          | ---          | <i>rpl14</i> |
| <i>Naegleria</i>     | <i>rps10</i> | <i>rpl11</i> | ---         | ---         | ---          | <i>rpl2</i> | <i>rps19</i> | ---          | ---           | <i>rps3</i> | <i>rpl16</i> | ---          | ---          | <i>rpl14</i> |

  

|                      | Spc          |             |              |             |             |              |             |              |              |             | Alpha      |              |              |             |
|----------------------|--------------|-------------|--------------|-------------|-------------|--------------|-------------|--------------|--------------|-------------|------------|--------------|--------------|-------------|
| <i>Rickettsia</i>    | <i>rpl24</i> | <i>rpl5</i> | <i>rps14</i> | <i>rps8</i> | <i>rpl6</i> | <i>rpl18</i> | <i>rps5</i> | <i>rpl30</i> | <i>rpl15</i> | <i>secY</i> | <i>adk</i> | <i>rps13</i> | <i>rps11</i> | <i>rpoA</i> |
| <i>Andalucia</i>     | ---          | <i>rpl5</i> | <i>rps14</i> | <i>rps8</i> | <i>rpl6</i> | <i>rpl18</i> | ---         | ---          | ---          | ---         | ---        | <i>rps13</i> | <i>rps11</i> | <i>rpoA</i> |
| <i>Tsukubamonas</i>  | ---          | <i>rpl5</i> | <i>rps14</i> | <i>rps8</i> | <i>rpl6</i> | ---          | ---         | ---          | ---          | ---         | ---        | <i>rps13</i> | <i>rps11</i> | ---         |
| <i>Amoeba</i> BB2    | ---          | <i>rpl5</i> | <i>rps14</i> | <i>rps8</i> | <i>rpl6</i> | ---          | ---         | ---          | ---          | ---         | ---        | <i>rps13</i> | <i>rps11</i> | ---         |
| <i>Pharyngomonas</i> | ---          | <i>rpl5</i> | <i>rps14</i> | <i>rps8</i> | <i>rpl6</i> | ---          | ---         | ---          | ---          | ---         | ---        | <i>rps13</i> | <i>rps11</i> | ---         |
| <i>Naegleria</i>     | ---          | <i>rpl5</i> | <i>rps14</i> | <i>rps8</i> | <i>rpl6</i> | ---          | ---         | ---          | ---          | ---         | ---        | <i>rps11</i> | <i>rps13</i> | ---         |

Figure S3. Gene order comparison of *Discoba* mtDNA and  $\alpha$ -proteobacteria *Rickettsia prowazekii* in the three contiguous ribosomal protein operons (S10-Spc-Alpha). Genes in reversed order are highlighted in green.



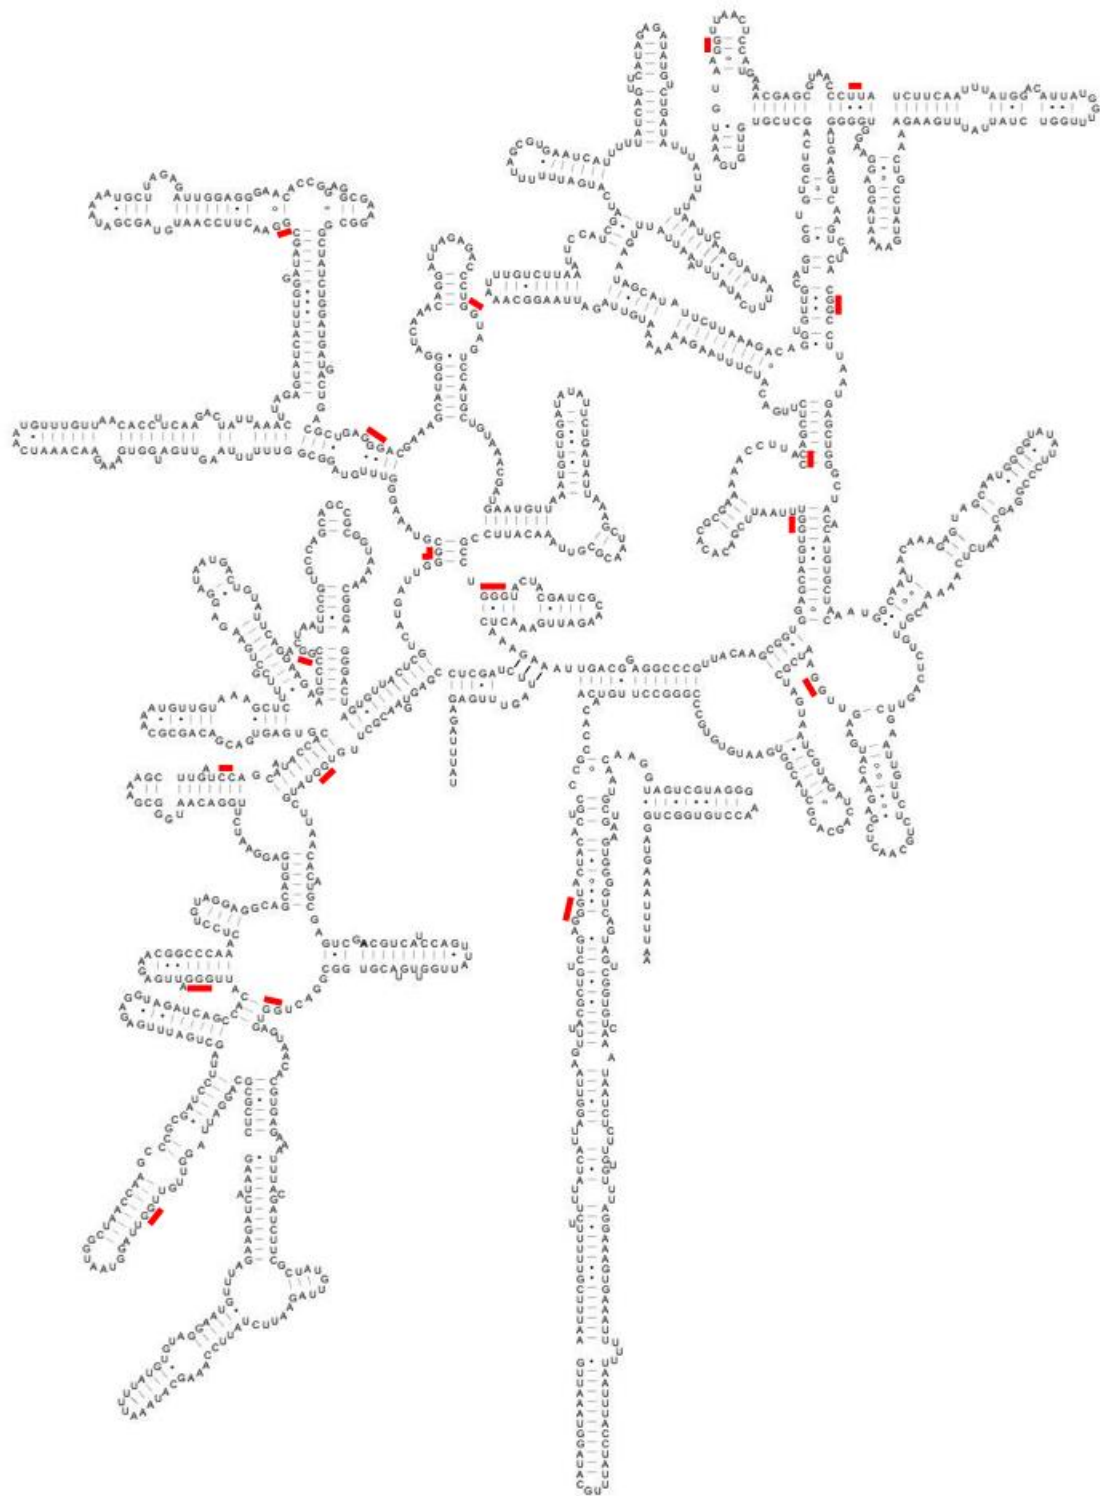

Figure S4. Predicted secondary structure of BB2 mitochondrial SSU rRNA. Regions including an editing site are indicated with red lines. For each highlighted region, only one nucleotide is inserted (the exact insertion sites are unknown since nucleotides are inserted next to one or more encoded nucleotides with the same identity).

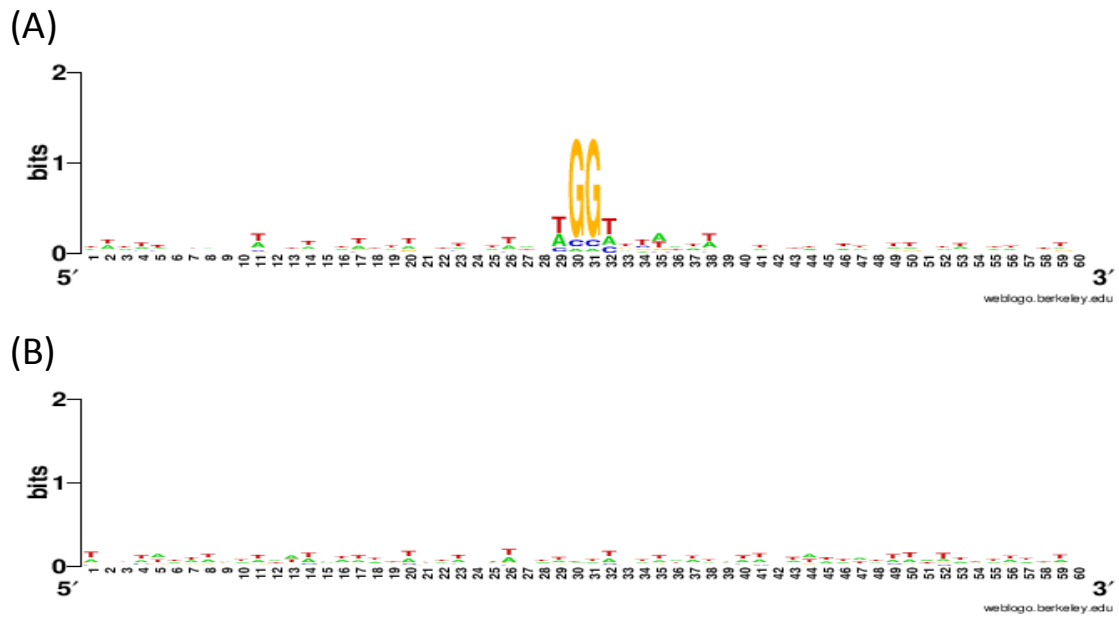

Figure S5. Sequence LOGO of (A) 311 60-nucleotide-long sequences near editing sites and (B) 328 random 60-nt-long sequences.
